# Supplementary material
Source: publisher site journal article supplement (https://www.dovepress.com/article/219271)
Supplement: Supplementary file 1 [file get_supplementary_file.php]

| Study <sup>reference number</sup>         | Study design                                  | Follow up | N (Eyes) | Baerveldt Type (mm <sup>2</sup> ) | Study Comparison  | Glaucoma Type        |
|-------------------------------------------|-----------------------------------------------|-----------|----------|-----------------------------------|-------------------|----------------------|
| Gedde SJ et al. 2018 <sup>1</sup>         | Multicenter RCT                               | 1 year    | 125      | 350                               | Trab + MMC        | (P)OAG, PEG/PEX      |
| Gedde SJ et al. 2019 <sup>2</sup>         | Multicenter RCT                               | 3 years   | 125      | 350                               | Trab + MMC        | (P)OAG, PEG/PEX      |
| Gedde SJ et al. 2007 <sup>3</sup>         | Multicenter RCT                               | 1 year    | 107      | 350                               | Trab + MMC        | (P)OAG, PEG/PEX      |
| Gedde SJ et al. 2012 <sup>4</sup>         | Multicenter RCT                               | 5 years   | 107      | 350                               | Trab + MMC        | (P)OAG, PEG/PEX      |
| Gedde SJ et al. 2007 <sup>5</sup>         | Multicenter RCT                               | 1 year    | 107      | 350                               | Trab + MMC        | (P)OAG, PEG/PEX      |
| Gedde SJ et al. 2012 <sup>6</sup>         | Multicenter RCT                               | 5 years   | 107      | 350                               | Trab + MMC        | (P)OAG, PEG/PEX      |
| Christakis PG et al. 2011 <sup>7</sup>    | Multicenter RCT                               | 1 year    | 114      | 350                               | Ahmed-FP7         | Glaucoma             |
| Christakis PG et al. 2016 <sup>8</sup>    | Multicenter RCT                               | 5 years   | 114      | 350                               | Ahmed-FP7         | Glaucoma             |
| Budenz DL et al. 2016 <sup>9</sup>        | Multicenter RCT                               | 5 years   | 133      | 350                               | Ahmed-FP7         | Glaucoma             |
| Budenz DL et al. 2011 <sup>10</sup>       | Multicenter RCT                               | 1 year    | 133      | 350                               | Ahmed-FP7         | Glaucoma             |
| Budenz DL et al. 2015 <sup>11</sup>       | Multicenter RCT                               | 5 years   | 133      | 350                               | Ahmed-FP7         | Glaucoma             |
| Britt MT et al. 1999 <sup>12</sup>        | Extended follow-up on a RCT                   | 5 years   | 53       | 350                               | Baerveldt-500     | Neovascular glaucoma |
| Iwasaki K et al. 2018 <sup>13</sup>       | Prospective cohort study                      | 1 year    | 45       | 350                               | N/A               | Glaucoma             |
| Chansangpetch S et al. 2018 <sup>14</sup> | Retrospective observational study             | 1.5 year  | 37       | 250 and 350                       | N/A               | Glaucoma             |
| Rai AS et al. 2018 <sup>15</sup>          | Retrospective cohort study.                   | 2 years   | 104      | 250 and 350                       | Ahmed-FP7/8       | Glaucoma             |
| Resende AF et al. 2016 <sup>16</sup>      | Retrospective chart review                    | 2 years   | 38       | 250 and 350                       | Ahmed-FP7, S2, M4 | Glaucoma             |
| Panarelli JF et al. 2016 <sup>17</sup>    | Retrospective comparative case series         | 3 years   | 55       | 350                               | Trab + MMC        | Glaucoma             |
| Iverson SM et al. 2015 <sup>18</sup>      | Retrospective chart review                    | 5 years   | 23       | 250 and 350                       | Trab + MMC        | Uveitic glaucoma     |
| Allan EJ et al. 2015 <sup>19</sup>        | Comparative case study                        | 3 years   | 52       | 350                               | Baerveldt-250     | Glaucoma             |
| Wang JC et al. 2004 <sup>20</sup>         | Retrospective nonrandomized study             | 0.5 year  | 24       | 350                               | Ahmed-S2          | Glaucoma             |
| Seah SK et al. 2003 <sup>21</sup>         | Retrospective nonrandomized comparative trial | 3 years   | 70       | 350                               | Baerveldt-250     | Glaucoma             |

Table S1. Summary of the retrieved studies from the systematic review.

RCT = Randomized Controlled Trial; Trab + MMC = trabeculectomy + mitomycin c, (P)OAG = (Primary) open-angle glaucoma; PEX/PEG = Pseudoexfoliation/PEX-glaucoma; Glaucoma= mixture of different types of glaucoma

| <b>Perioperative</b>                    | <b>RCT<sup>1,5</sup></b>        | <b>Non-RCT</b>                       |
|-----------------------------------------|---------------------------------|--------------------------------------|
| Vitreous prolaps                        | 0-1%                            | N/A                                  |
| Scleral perforation                     | 3%                              | N/A                                  |
| Hyphema                                 | 1-3%                            | N/A                                  |
| Conjunctival buttonhole                 | 2%                              | N/A                                  |
| <b>Early postoperative ≤3 months</b>    | <b>RCT<sup>2,6,9</sup></b>      | <b>Non-RCT<sup>14,17,18,21</sup></b> |
| Hyphema                                 | 2-17%                           | 0-10%                                |
| Choroidal effusion                      | 10-14%                          | 1-16%                                |
| Shallow or flat anterior chamber        | 10-20%                          | 3-19%                                |
| Wound leak                              | 1%                              | 3%                                   |
| Corneal edema                           | 22%                             | N/A                                  |
| Cystoid macula edema                    | 2%                              | 4%                                   |
| Suprachoroidal hemorrhage               | 2%                              | 1%                                   |
| Diplopia/ Motility disorder             | 5%                              | 9%                                   |
| Aqueous misdirection                    | 3%                              | N/A                                  |
| Hypotony maculopathy                    | 2%                              | 0%                                   |
| Endophtalmitis or blebitis              | 1%                              | 0-3%                                 |
| Vitreous hemorrhage                     | 1-2%                            | 0-3%                                 |
| Tube complication                       | 16%                             | 3%                                   |
| Retinal detachment                      | N/A                             | 4%                                   |
| Total surgical reinterventions required | 13-22%                          | N/A                                  |
| <b>Late postoperative ≤5 years</b>      | <b>RCT<sup>1,2,5-9,11</sup></b> | <b>Non-RCT<sup>13-21</sup></b>       |
| Hyphema                                 | 2-19%                           | 0-33%                                |
| Choroidal effusion                      | 12-16%                          | 1-22%                                |
| Shallow or flat anterior chamber        | 1-20%                           | 3-30%                                |
| Wound leak                              | 1%                              | 0-3%                                 |
| Corneal edema                           | 12-34%                          | 2-19%                                |
| Encapsulated bleb                       | 2-11%                           | N/A                                  |
| Dysesthesia                             | 1%                              | N/A                                  |
| Cystoid macula edema                    | 5-9%                            | 4-26%                                |
| Suprachoroidal hemorrhage               | 2-3%                            | 1-3%                                 |
| Diplopia/ Motility disorder             | 2-17%                           | 4-9%                                 |
| Aqueous misdirection                    | 3-4%                            | 4%                                   |
| Hypotony maculopathy                    | 3-4%                            | 0-6%                                 |
| Endophtalmitis or blebitis              | 1-3%                            | 0-3%                                 |
| Iritis                                  | 2-12%                           | N/A                                  |
| Vitreous hemorrhage                     | 1-5%                            | 0-3%                                 |
| Tube complication                       | 8-33%                           | 4-13%                                |
| Retinal detachment                      | 1-2%                            | 2-4%                                 |
| Cataract progression                    | 41%                             | 4-6%                                 |
| No light perception                     | 6%                              | N/A                                  |
| Phthisis bulbi                          | 2-6%                            | 0-4%                                 |
| Total surgical reinterventions required | 22-51%                          | 0-19%                                |

Table S2. Incidence ranges of perioperative and postoperative complications recorded in the included RCT (=Randomized Controlled Trial) and non-RCT studies. Presented with reference number of corresponding study.

## References

1. Gedde SJ, Feuer WJ, Shi W, Lim KS, Barton K, Goyal S, et al. Treatment Outcomes in the Primary Tube Versus Trabeculectomy Study after 1 Year of Follow-up. *Graefes Arch Clin Exp Ophthalmol*. 2018;125(5):650-63.
2. Gedde SJ, Feuer WJ, Lim KS, Barton K, Goyal S, Ahmed, II, et al. Treatment Outcomes in the Primary Tube Versus Trabeculectomy (PTVT) Study after 3 Years of Follow-up. *Ophthalmology*. 2019.
3. Gedde SJ, Schiffman JC, Feuer WJ, Herndon LW, Brandt JD, Budenz DL. Treatment outcomes in the tube versus trabeculectomy study after one year of follow-up. *Am J Ophthalmol*. 2007;143(1):9-22.
4. Gedde SJ, Schiffman JC, Feuer WJ, Herndon LW, Brandt JD, Budenz DL. Treatment outcomes in the Tube Versus Trabeculectomy (TVT) study after five years of follow-up. *Am J Ophthalmol*. 2012;153(5):789-803.e2.
5. Gedde SJ, Herndon LW, Brandt JD, Budenz DL, Feuer WJ, Schiffman JC. Surgical complications in the Tube Versus Trabeculectomy Study during the first year of follow-up. *Am J Ophthalmol*. 2007;143(1):23-31.
6. Gedde SJ, Herndon LW, Brandt JD, Budenz DL, Feuer WJ, Schiffman JC. Postoperative complications in the Tube Versus Trabeculectomy (TVT) study during five years of follow-up. *Am J Ophthalmol*. 2012;153(5):804-14.e1.
7. Christakis PG, Kalenak JW, Zurakowski D, Tsai JC, Kammer JA, Harasymowycz PJ, et al. The Ahmed Versus Baerveldt study: one-year treatment outcomes. *Ophthalmology*. 2011;118(11):2180-9.
8. Christakis PG, Kalenak JW, Tsai JC, Zurakowski D, Kammer JA, Harasymowycz PJ, et al. The Ahmed Versus Baerveldt Study: Five-Year Treatment Outcomes. *Ophthalmology*. 2016;123(10):2093-102.
9. Budenz DL, Barton K, Feuer WJ, Schiffman J, Costa VP, Godfrey DG, et al. Treatment outcomes in the Ahmed Baerveldt Comparison Study after 1 year of follow-up. *Ophthalmology*. 2011;118(3):443-52.
10. Budenz DL, Barton K, Gedde SJ, Feuer WJ, Schiffman J, Costa VP, et al. Five-year treatment outcomes in the Ahmed Baerveldt comparison study. *Ophthalmology*. 2015;122(2):308-16.
11. Budenz DL, Feuer WJ, Barton K, Schiffman J, Costa VP, Godfrey DG, et al. Postoperative Complications in the Ahmed Baerveldt Comparison Study During Five Years of Follow-up. *Am J Ophthalmol*. 2016;163:75-82.e3
12. Britt MT, LaBree LD, Lloyd MA, Minckler DS, Heuer DK, Baerveldt G, et al. Randomized clinical trial of the 350-mm<sup>2</sup> versus the 500-mm<sup>2</sup> Baerveldt implant: longer term results: is bigger better? *Ophthalmology*. 1999;106(12):2312-8.

13. Iwasaki K, Arimura S, Takihara Y, Takamura Y, Inatani M. Prospective cohort study of corneal endothelial cell loss after Baerveldt glaucoma implantation. *Acta Ophthalmol.* 2018;13(7):e0201342.
14. Chansangpetch S, Surukrattanaskul S, Tapaneeyangkul P, Tantisevi V. Hypertensive phase and its association with surgical outcomes in Baerveldt implantation. *Int Ophthalmol.* 2018;38(4):1717-25.
15. Rai AS, Shoham-Hazon N, Christakis PG, Rai AS, Ahmed IIK. Comparison of the Ahmed and Baerveldt glaucoma shunts with combined cataract extraction. *Can J Ophthalmol.* 2018;53(2):124-30.
16. Resende AF, Moster MR, Patel NS, Lee D, Dhani H, Pro MJ, et al. Ahmed Versus Baerveldt Glaucoma Drainage Implantation in Patients With Markedly Elevated Intraocular Pressure ( $\geq 30$  mm Hg). *Graefes Arch Clin Exp Ophthalmol.* 2016;25(9):738-43.
17. Panarelli JF, Banitt MR, Gedde SJ, Shi W, Schiffman JC, Feuer WJ. A Retrospective Comparison of Primary Baerveldt Implantation versus Trabeculectomy with Mitomycin C. *Ophthalmology.* 2016;123(4):789-95.
18. Iverson SM, Bhardwaj N, Shi W, Sehi M, Greenfield DS, Budenz DL, et al. Surgical outcomes of inflammatory glaucoma: a comparison of trabeculectomy and glaucoma-drainage-device implantation. *Jpn J Ophthalmol.* 2015;59(3):179-86.
19. Allan EJ, Khaimi MA, Jones JM, Ding K, Skuta GL. Long-term efficacy of the Baerveldt 250 mm<sup>2</sup> compared with the Baerveldt 350 mm<sup>2</sup> implant. *Ophthalmology.* 2015;122(3):486-93.
20. Wang JC, See JL, Chew PT. Experience with the use of Baerveldt and Ahmed glaucoma drainage implants in an Asian population. *Ophthalmology.* 2004;111(7):1383-8.
21. Seah SK, Gazzard G, Aung T. Intermediate-term outcome of Baerveldt glaucoma implants in Asian eyes. *Ophthalmology.* 2003;110(5):888-94.
